# Supplementary material for: Phylogenomics Reveal the Dynamic Evolution of Fungal Nitric Oxide Reductases and Their Relationship to Secondary Metabolism
Source: PubMed Central journal article supplement — Genome Biol Evol. 2018 Aug 29;10(9):2474–89. doi: 10.1093/gbe/evy187 (PMC6161760; doi:10.1093/gbe/evy187), 2018-08-29
Supplement: evy187_supp.pdf [file evy187_supp.pdf]

## 1 **Supplementary Materials**

### 2 List of Supplementary Materials

## 3 **Materials and Methods**

## 4 **References**

5 **Table S1.** Counts of denitrification traits and their co-occurrences in fungal genomes.

6 **Table S2.** Results from approximately unbiased tests for the monophyly of fungal classes within  
7 *napA*, *nirK*, and *p450nor* gene trees. Where indicated, the monophyly of two lineages was also  
8 assessed. Bold font data indicate that the AU test rejected the monophyly of the taxa. Test  
9 significance was evaluated at  $p \leq 0.05$ .

10 **Table S3.** Results from species-tree gene-tree reconciliation using NOTUNG software for *napA*,  
11 *nirK*, and *p450nor* genes in fungi. Values are averages of solutions with standard deviations  
12 reported in parentheses.

13 **Table S4.** Predicted horizontal gene transfers of fungal *p450nor*, *napA*, and *nirK* genes based on  
14 alien index algorithm.

15 **Table S5.** List of genera containing species with and without *p450nor*.

16 **Figure S1.** Gene abundances of *narG*, *napA*, *nirK*, *p450nor*, and flavohemoglobins (colored  
17 bars) mapped on to fungal families (cladogram, left). Relationships among fungal families in the  
18 cladogram were derived from the NCBI taxonomy using the online tool phyloT  
19 (<http://phylot.biobyte.de/index.html>).

20 **Figure S2.** Maximum-Likelihood phylogenies connecting fungal species with their respective  
21 NO reductase (*p450nor*) gene sequence(s). On the left, an amino acid phylogeny of 238  
22 concatenated single copy orthologues from fungal species in which one or more *p450nor* gene(s)  
23 were detected. The *p450nor* nucleotide phylogeny (right) demonstrates many instances of

24 incongruence with the fungal species phylogeny. Black dots in each phylogeny represent  
25 bootstrap percentages greater than or equal to 90%. Scale bars represent amino acid (left tree)  
26 and nucleotide (right tree) substitutions per site. A high-resolution file of the tree is available at  
27 <https://doi.org/10.6084/m9.figshare.c.3845692>.

28 **Figure S3.** Cophylogenetic plot of *napA*-containing fungal species (left, N = 75) and the *napA*  
29 nucleotide tree (right, N = 78). Both are midpoint rooted Maximum-Likelihood trees where black  
30 dots represent bootstrap percentages  $\geq 90\%$ . Scale bars indicate substitutions per site for the  
31 concatenated amino acid species phylogeny and nucleotide phylogeny, respectively. A high-  
32 resolution file of the tree is available at <https://doi.org/10.6084/m9.figshare.c.3845692>.

33 **Figure S4.** Cophylogenetic plot of *nirK*-containing fungal species (left, N = 82) and the *nirK*  
34 nucleotide tree (right, N = 83). Both are midpoint rooted Maximum-Likelihood trees where black  
35 dots represent bootstrap percentages  $\geq 90\%$ . Scale bars indicate substitutions per site for the  
36 concatenated amino acid species phylogeny and nucleotide phylogeny, respectively. A high-  
37 resolution file of the tree is available at <https://doi.org/10.6084/m9.figshare.c.3845692>.

38 **Figure S5.** Plot of alien index values observed for *p450nor* genes (N = 178). Points above the  
39 hashed line at the origin are indicative of HGT. Names of fungal species with alien index values  
40 above zero are ordered as their points appear on the graph. Thick horizontal lines represent the  
41 median alien index value. See Materials and Methods in the Supplementary Materials for details  
42 on alien index calculations.

43 **Figure S6.** Bayesian tree reconstruction of actinobacterial and proteobacterial 16S rRNA genes  
44 (left, N = 55) and cytochrome P450 family 105 amino acid sequences (right, N = 57). Both  
45 phylogenies represent 50% majority-rule consensus trees. The tree on the left is rooted with  
46 proteobacterial sequences as outgroup to the *Actinobacteria*. The tree on the right is midpoint

47 rooted. Nodes with posterior probabilities  $\geq 0.95$  are indicated by black circles on an adjacent  
48 branch.

49 **Figure S7.** Midpoint rooted Bayesian (left) and Maximum-Likelihood phylogenies (right) of  
50 cytochrome P450 sequences (N = 408) demonstrating the affiliation of P450nor with other  
51 sequences belonging to members of the bacterial phyla Actinobacteria and Proteobacteria.  
52 Cyanobacterial cytochrome P450 sequences were included as outgroups. Black squares on  
53 branches (left tree) indicate  $\geq 0.95$  posterior probability or  $\geq 90$  % bootstrap replication (right  
54 tree). The colored legend indicates the cytochrome P450 family specified by shared amino acid  
55 identity of  $\geq 40$  % (D.R. Nelson, Hum Genomics 4:59-65, 2009).

56 **Figure S8.** Bayesian and Maximum-likelihood phylogenies of NapA, NirK, and P450nor amino  
57 acid sequence homologs extracted from the RefSeq protein database. A high-resolution file of  
58 these trees are available at <https://doi.org/10.6084/m9.figshare.c.3845692>.

59 **Figure S9.** Genome regions chosen for in depth presentation of protein coding genes  
60 surrounding *p450nor* in predicted BGC regions. Labels above genes are functional annotations  
61 from alignments to the eggNOG database. NCBI gene loci accessions are labeled below each  
62 gene.

63

## 64 **Materials and Methods**

### 65 *Phylogenetic reconstructions*

66 Selection of the optimal evolutionary model for ML tree reconstruction was performed using  
67 protest (Abascal *et al.*, 2005) (amino acid alignment) and jmodeltest (Posada, 2008) (nucleotide  
68 alignment) software prior to ML tree reconstruction. Please refer to SI for additional details  
69 about evolutionary models used in phylogenetic analysis. Phylogenetic analysis with RAxML

70 was performed by sampling 20 starting trees and performing 1,000 replicate bootstrap analyses.  
71 The tree with the maximal negative log likelihood score was compared to 1,000 replicates in  
72 RAxML to generate the final tree. Bayesian tree construction was performed using 3 independent  
73 runs with 6 chains for 5,000,000 generations. Output from MrBayes was evaluated with the  
74 sump and sumt commands within the software to ensure Markov Chain Monte Carlo chain  
75 mixing and convergence (potential scale reduction factor of 1.0) and standard deviation of split  
76 frequencies  $\sim 0.01$  or lower. MrBayes output was further visualized in the program Tracer  
77 (<http://tree.bio.ed.ac.uk/software/tracer/>) to ensure convergence was reached.

78 Optimal evolutionary models for Bayesian analysis were estimated from the alignments  
79 using MrBayes software with a mixed amino acid model with 4 chains. The analysis continued  
80 for 1,000,000 generations, with sampling performed every 1,000<sup>th</sup> generation and a default  
81 burn-in of 25 %. Optimal amino acid models inferred by prottest ML analyses were LG (Le and  
82 Gascuel, 2008) (NapA, P450nor) or JTT (Jones *et al.*, 1992) models (NirK), whereas for  
83 nucleotide sequences, the GTR (Rodriguez *et al.*, 1990) model with variation in rate  
84 heterogeneity among sites was selected by jmodeltest as the optimal evolutionary model for each  
85 gene. Optimal amino acid models inferred with MrBayes were the WAG (Whelan and Goldman,  
86 2001) (NapA and P450nor) or the JTT model (NirK). The GTR model with rate heterogeneity  
87 among sites was also the optimally inferred evolutionary model for nucleotide alignments used  
88 for Bayesian tree reconstruction. For phylogenetic analysis of fungal NapA, NirK, and P450nor  
89 with additional RefSeq protein sequences, the LG (ML) or WAG (Bayesian) models were  
90 selected in the respective phylogenetic software. All amino acid tree reconstruction utilized  
91 gamma distributed rate heterogeneity among sites, and additional tree reconstruction parameters  
92 were estimated from the alignment.

93 BayesTraits and NOTUNG analyses

94 For trait correlations, the concatenated 238 BUSCO gene alignment (see main text Materials and  
95 Methods) of 709 fungal taxa was bootstrapped into 800 replicate alignments using the PHYLIP  
96 software function seqboot (6) and 800 ML trees created as described in the main text using  
97 FastTree2 software. These alignments were paired with presence/absence data regarding  
98 denitrification traits and provided as input to BayesTraits software. BayesTraits was first  
99 operated in ML mode (100 ML tries setting) to generate parameter estimates for dependent (trait  
100 correlation) and independent (no trait correlation) models to be compared. These parameter  
101 estimates were then entered into BayesTraits, and three independent runs of the software in  
102 Bayesian mode using the dependent and independent model of trait correlation between the two  
103 traits being compared were performed. The analysis was run for 1,000,000 generations with  
104 samples taken every 1,000<sup>th</sup> generation and a burn-in of 50,000 generations. A stepping stone  
105 analysis (100 stones, 10,000 samples) was performed to generate log marginal likelihood values  
106 for Bayes Factor (BF) calculations to test which model (correlation or no correlation) best fit the  
107 data. Bayes Factors are comparable to a likelihood ratio test for model selection, and the larger  
108 the Bayes Factor the more certainty there is in the more complex, dependent model (indicating  
109 trait correlation). Hence, a BF of 1 is indicative of weak or no trait correlation, but a BF of 10 or  
110 larger indicates strong selection of the dependent model and trait correlation (Pagel *et al.*, 2004).  
111 A similar analysis is performed for ancestral state reconstruction, except that trees from a  
112 Bayesian analysis were used as input to the MultiState method of the software. Multistate was  
113 run for 5,500,000 generations with sampling every 2,000<sup>th</sup> generation and a burn-in of 500,000  
114 generations. The probability of a given character state at a node within the tree was averaged

115 over all generations after the burn-in period and was used to determine support for the state of a  
116 node within the tree.

117 NOTUNG performs reconciliation by matching nodes between species and gene trees to  
118 infer numbers of GD, GL, and GT events. These reconciliations are used to calculate a weighted  
119 sum, termed the event score, by multiplying user supplied event costs for GD, GL, and GTs.  
120 When inferring GTs, multiple solutions may be reached, and NOTUNG reports all  
121 reconciliations reached to obtain a minimized event score. NOTUNG analyses were  
122 implemented with a duplication cost of 2, loss cost of 1, and a variable transfer cost from 3 to 15.  
123 Ratcheting the transfer costs assumes GD is prevalent, which is likely the case for fungi, in  
124 which GT events are assumed to be less frequent than for *Bacteria* and *Archaea*. All other  
125 settings were default. NOTUNG ignores incomplete lineage sorting as an evolutionary  
126 mechanism when both a rooted species and gene tree are used as input, as was the case for the  
127 present study.

### 128 *Alien index calculations*

129 The alien index (AI) was calculated as previously described and modified for use with a single  
130 gene (Wisecaver *et al.*, 2016). Briefly, pairwise amino acid sequence alignments were performed  
131 using blastp for fungal NapA, NirK, and P450nor sequences. The in group was defined as the  
132 aligned sequence with the highest bitscore (excluding the query) belonging to the same  
133 taxonomic class as the query sequence. Accordingly, the out group was defined as the aligned  
134 sequence with the highest bitscore not belonging to the same taxonomic class as the query. The  
135 maximum bitscore was the bitscore derived from the alignment of the query to itself. Therefore,  
136 AI is calculated as follows:

$$137 \quad AI = (out\ group\ bitscore / max\ bitscore) - (in\ group\ bitscore / max\ bitscore)$$

138 AI values range from 1 to -1. Values greater than zero are indicative of HGT or contamination of  
139 foreign DNA within the genome sequence being queried.

140

#### 141 **References**

142 Abascal F, Zardoya R, Posada D. (2005). ProtTest: selection of best-fit models of protein  
143 evolution. *Bioinforma* **21** : 2104–2105.

144 Jones D, Taylor W, Thornton J. (1992). The rapid generation of mutation data matrices from  
145 protein sequences. *Comput Appl Biosci* **8**.

146 Le SQ, Gascuel O. (2008). An improved general amino acid replacement matrix. *Mol Biol Evol*  
147 **25**: 1307–20.

148 Pagel M, Meade A, Barker D. (2004). Bayesian estimation of ancestral character states on  
149 phylogenies. *Syst Biol* **53**: 673–684.

150 Posada D. (2008). jModelTest: Phylogenetic model averaging. *Mol Biol Evol* **25**: 1253–1256.

151 Rodriguez R, Oliver JL, Marin A, Medina JR. (1990). The general stochastic model of  
152 nucleotide substitution. *J Theor Biol* **142**. doi:10.1016/S0022-5193(05)80104-3.

153 Whelan S, Goldman N. (2001). A general empirical model of protein evolution derived from  
154 multiple protein families using a maximum-likelihood approach. *Mol Biol Evol* **18**: 691–699.

155 Wisecaver JH, Alexander WG, King SB, Todd Hittinger C, Rokas A. (2016). Dynamic evolution  
156 of nitric oxide detoxifying flavohemoglobins, a family of single-protein metabolic modules in  
157 *Bacteria* and Eukaryotes. *Mol Biol Evol*. doi:10.1093/molbev/msw073.

158

159 **Table S1.** Counts of denitrification traits and their co-occurrences in fungal genomes.

| Fungal lineage         | <i>napA</i> | <i>nirK</i> | <i>p450nor</i> | flavoHb* | <i>napA+nirK</i> | <i>napA+</i><br><i>p450nor</i> | <i>nirK+</i><br><i>p450nor</i> | <i>napA+</i><br><i>nirK+</i><br><i>p450nor</i> | <i>p450nor+</i><br>flavoHb | ( <i>p450nor+</i><br>flavoHb)/ <i>p450nor</i> † |
|------------------------|-------------|-------------|----------------|----------|------------------|--------------------------------|--------------------------------|------------------------------------------------|----------------------------|-------------------------------------------------|
| Sordariomycetes        | 23          | 20          | 63             | 155      | 7                | 11                             | 15                             | 6                                              | 62                         | 0.98                                            |
| Leotiomycetes          | 2           | 9           | 36             | 25       | 1                | 2                              | 8                              | 1                                              | 19                         | 0.53                                            |
| Eurotiomycetes         | 34          | 52          | 35             | 80       | 19               | 15                             | 24                             | 11                                             | 16                         | 0.46                                            |
| Dothideomycetes        | 7           | 1           | 28             | 75       | 0                | 2                              | 1                              | 0                                              | 27                         | 0.96                                            |
| Tremellomycetes        | 1           | 0           | 3              | 12       | 0                | 0                              | 0                              | 0                                              | 1                          | 0.33                                            |
| Atractiellomycetes     | 0           | 0           | 1              | 0        | 0                | 0                              | 0                              | 0                                              | 0                          | 0                                               |
| Pezizomycetes          | 0           | 0           | 1              | 0        | 0                | 0                              | 0                              | 0                                              | 0                          | 0                                               |
| Mixiomycetes           | 0           | 0           | 0              | 0        | 0                | 0                              | 0                              | 0                                              | 0                          | n/a                                             |
| Agaricomycetes         | 1           | 0           | 0              | 17       | 0                | 0                              | 0                              | 0                                              | 0                          | n/a                                             |
| Saccharomycetes        | 0           | 0           | 0              | 63       | 0                | 0                              | 0                              | 0                                              | 0                          | n/a                                             |
| Pucciniomycetes        | 2           | 0           | 0              | 1        | 0                | 0                              | 0                              | 0                                              | 0                          | n/a                                             |
| Monoblepharidomycetes  | 0           | 0           | 0              | 0        | 0                | 0                              | 0                              | 0                                              | 0                          | n/a                                             |
| Chytridiomycetes       | 0           | 0           | 0              | 0        | 0                | 0                              | 0                              | 0                                              | 0                          | n/a                                             |
| Wallemiomycetes        | 0           | 0           | 0              | 1        | 0                | 0                              | 0                              | 0                                              | 0                          | n/a                                             |
| Ustilaginomycetes      | 0           | 0           | 0              | 1        | 0                | 0                              | 0                              | 0                                              | 0                          | n/a                                             |
| Orbiliomycetes         | 0           | 0           | 0              | 2        | 0                | 0                              | 0                              | 0                                              | 0                          | n/a                                             |
| Basidiobolomycetes     | 0           | 0           | 0              | 0        | 0                | 0                              | 0                              | 0                                              | 0                          | n/a                                             |
| Dacrymycetes           | 0           | 0           | 0              | 0        | 0                | 0                              | 0                              | 0                                              | 0                          | n/a                                             |
| Geminibasidiomycetes   | 0           | 0           | 0              | 0        | 0                | 0                              | 0                              | 0                                              | 0                          | n/a                                             |
| Zoopagomycota          | 0           | 0           | 0              | 1        | 0                | 0                              | 0                              | 0                                              | 0                          | n/a                                             |
| Schizosaccharomycetes  | 0           | 0           | 0              | 3        | 0                | 0                              | 0                              | 0                                              | 0                          | n/a                                             |
| Pneumocystidomycetes   | 0           | 0           | 0              | 0        | 0                | 0                              | 0                              | 0                                              | 0                          | n/a                                             |
| Blastocladiomycetes    | 0           | 0           | 0              | 0        | 0                | 0                              | 0                              | 0                                              | 0                          | n/a                                             |
| Lecanoromycetes        | 1           | 0           | 0              | 0        | 0                | 0                              | 0                              | 0                                              | 0                          | n/a                                             |
| Malasseziomycetes      | 0           | 0           | 0              | 12       | 0                | 0                              | 0                              | 0                                              | 0                          | n/a                                             |
| Taphrinomycetes        | 0           | 0           | 0              | 1        | 0                | 0                              | 0                              | 0                                              | 0                          | n/a                                             |
| Microbotryomycetes     | 4           | 0           | 0              | 0        | 0                | 0                              | 0                              | 0                                              | 0                          | n/a                                             |
| Exobasidiomycetes      | 0           | 0           | 0              | 0        | 0                | 0                              | 0                              | 0                                              | 0                          | n/a                                             |
| Entomophthoromycetes   | 0           | 0           | 0              | 1        | 0                | 0                              | 0                              | 0                                              | 0                          | n/a                                             |
| Neocallimastigomycetes | 0           | 0           | 0              | 0        | 0                | 0                              | 0                              | 0                                              | 0                          | n/a                                             |
| Glomeromycetes         | 0           | 0           | 0              | 0        | 0                | 0                              | 0                              | 0                                              | 0                          | n/a                                             |
| Total                  | 75          | 82          | 167            | 450      | 27               | 30                             | 48                             | 18                                             | 125                        | n/a                                             |

A “+” indicates that each gene had to be present in each genome evaluated in order to add to the overall count for that lineage.

\*FlavoHb = flavohemoglobin

†n/a = Not applicable since *p450nor* genes were not detected



161 **Table S2.** Results from approximately unbiased tests for the monophyly of fungal classes within *napA*, *nirK*, and *p450nor* gene trees.  
 162 Where indicated, the monophyly of two lineages was also assessed. Bold font data indicate that the AU test rejected the monophyly of  
 163 the taxa. Test significance was evaluated at  $p \leq 0.05$ .

| Gene        | Lineage               | No. Genes | No. Taxa | No. Genera | Approximately unbiased test |                   |                   |                 |                  |                 |
|-------------|-----------------------|-----------|----------|------------|-----------------------------|-------------------|-------------------|-----------------|------------------|-----------------|
|             |                       |           |          |            | Monophyletic                |                   | Amino acid        |                 | Nucleotide       |                 |
|             |                       |           |          |            | <i>Amino acid</i>           | <i>Nucleotide</i> | <i>Diff -lnL*</i> | <i>P value</i>  | <i>Diff -lnL</i> | <i>P value</i>  |
| <i>napA</i> | Agaricomycetes        | 2         | 1        | 1          | Yes                         | Yes               | -                 | -               | -                | -               |
|             | Dothideomycetes       | 7         | 7        | 6          | <b>No</b>                   | <b>No</b>         | <b>40</b>         | <b>0.015</b>    | <b>40</b>        | <b>0.001</b>    |
|             | Eurotiomycetes        | 36        | 34       | 14         | <b>No</b>                   | <b>No</b>         | <b>753</b>        | <b>2.00E-06</b> | <b>550</b>       | <b>4.00E-04</b> |
|             | Lecanoromycetes (Lec) | 1         | 1        | 1          | Yes                         | Yes               | -                 | -               | -                | -               |
|             | Leotiomycetes (L)     | 2         | 2        | 2          | Yes                         | Yes               | -                 | -               | -                | -               |
|             | Microbotryomycetes    | 4         | 4        | 1          | Yes                         | Yes               | -                 | -               | -                | -               |
|             | Pucciniomycetes       | 2         | 2        | 2          | <b>No</b>                   | <b>No</b>         | <b>1303</b>       | <b>9.00E-05</b> | <b>1088</b>      | <b>2.00E-08</b> |
|             | Sordariomycetes (S)   | 23        | 23       | 18         | <b>No</b>                   | <b>No</b>         | <b>806</b>        | <b>7.00E-61</b> | <b>770</b>       | <b>9.00E-56</b> |
|             | Tremellomycetes       | 1         | 1        | 1          | Yes                         | Yes               | -                 | -               | -                | -               |
|             | L+S share MRCA        |           |          |            | <b>No</b>                   | <b>No</b>         | <b>908</b>        | <b>2.00E-71</b> | <b>973</b>       | <b>6.00E-74</b> |
|             | Lec+E share MRCA      |           |          |            | <b>No</b>                   | <b>No</b>         | <b>75</b>         | <b>3.00E-05</b> | <b>257</b>       | <b>9.00E-06</b> |
| <i>nirK</i> | Dothideomycetes       | 1         | 1        | 1          | Yes                         | Yes               | -                 | -               | -                | -               |
|             | Eurotiomycetes        | 52        | 52       | 17         | No                          | No                | 19                | 0.142           | 33               | <b>0.003</b>    |
|             | Leotiomycetes         | 10        | 9        | 1          | Yes                         | Yes               | -                 | -               | -                | -               |
|             | Sordariomycetes       | 20        | 20       | 8          | Yes                         | Yes               | -                 | -               | -                | -               |
|             | D+E share MRCA        |           |          |            | <b>No</b>                   | <b>No</b>         | <b>15</b>         | <b>0.042</b>    | <b>30.1</b>      | <b>0.004</b>    |
|             | L+S share MRCA        |           |          |            | No                          | No                | 18                | 0.142           | 35.3             | 0.001           |

164 \*Diff -lnL = difference in negative log-likelihood of the observed tree to the constraint tree in which the taxa were constrained to be monophyletic.

165

166

167

168 **Table S2.** (continued)

| Gene           | Lineage             | No. Genes | No. Taxa | No. Genera | Approximately unbiased test |                   |                   |                |                  |                |
|----------------|---------------------|-----------|----------|------------|-----------------------------|-------------------|-------------------|----------------|------------------|----------------|
|                |                     |           |          |            | Monophyletic                |                   | Amino acid        |                | Nucleotide       |                |
|                |                     |           |          |            | <i>Amino acid</i>           | <i>Nucleotide</i> | <i>Diff -lnL*</i> | <i>P value</i> | <i>Diff -lnL</i> | <i>P value</i> |
| <i>p450nor</i> | Dothideomycetes (D) | 28        | 28       | 26         | No                          | No                | 1153              | 4.00E-05       | 1294             | 8.00E-51       |
|                | Eurotiomycetes (E)  | 36        | 35       | 17         | No                          | No                | 891               | 1.00E-32       | 917              | 2.00E-37       |
|                | Leotiomycetes (L)   | 37        | 36       | 16         | No                          | No                | 465               | 2.00E-39       | 694              | 4.00E-40       |
|                | Sordariomycetes (S) | 72        | 63       | 32         | No                          | No                | 1159              | 5.00E-10       | 1206             | 5.00E-15       |
|                | Tremellomycetes     | 3         | 3        | 2          | No                          | No                | 125               | 3.00E-04       | 125              | 3.00E-08       |
|                | Atractiellomycetes  | 1         | 1        | 1          | Yes                         | Yes               | -                 | -              | -                | -              |
|                | Pezizomycetes       | 1         | 1        | 1          | Yes                         | Yes               | -                 | -              | -                | -              |
|                | L+S share MRCA      |           |          |            | No                          | No                | 1386              | 3.00E-43       | 1420             | 5.00E-72       |
|                | D+E share MRCA      |           |          |            | No                          | No                | 1481              | 0.001          | 1481             | 2.00E-63       |
|                | Ascomycota (A)      |           |          |            | No                          | No                | 139               | 5.00E-05       | 140              | 6.00E-06       |
|                | Basidiomycota (B)   |           |          |            | No                          | No                | 139               | 4.00E-56       | 139              | 1.00E-39       |
|                | A+B share MRCA      |           |          |            | No                          | No                | 139               | 3.00E-11       | 140              | 3.00E-04       |

\*Diff -lnL = difference in negative log-likelihood of the observed tree to the constraint tree in which the taxa were constrained to be monophyletic.

169

170

171

172

173

174

175

176 **Table S3.** Results from species-tree gene-tree reconciliation using NOTUNG software for *napA*, *nirK*, and *p450nor* genes in fungi.  
 177 Values are averages of solutions with standard deviations reported in parentheses.

| Gene           | Phylogeny  | Duplications | Codivergences | Transfers  | Losses      | Duplication cost | Transfer cost | Loss cost | Solutions |
|----------------|------------|--------------|---------------|------------|-------------|------------------|---------------|-----------|-----------|
| <i>p450nor</i> | amino acid | -            | -             | -          | -           | 2                | 3             | 1         | 0         |
|                |            | -            | -             | -          | -           | 2                | 5             | 1         | 0         |
|                |            | -            | -             | -          | -           | 2                | 7             | 1         | 0         |
|                |            | -            | -             | -          | -           | 2                | 9             | 1         | 0         |
|                |            | 49.0 (0.0)   | 0.0 (0.0)     | 15.0 (0.0) | 253.0 (0.0) | 2                | 11            | 1         | 1000      |
|                |            | 61.0 (0.0)   | 0.0 (0.0)     | 6.0 (0.0)  | 333.0 (0.0) | 2                | 13            | 1         | 180       |
|                |            | 62.1 (1.0)   | 0.0 (0.0)     | 5.4 (0.5)  | 339.3 (5.4) | 2                | 15            | 1         | 420       |
| <i>p450nor</i> | nucleotide | -            | -             | -          | -           | 2                | 3             | 1         | 0         |
|                |            | -            | -             | -          | -           | 2                | 5             | 1         | 0         |
|                |            | -            | -             | -          | -           | 2                | 7             | 1         | 0         |
|                |            | 45.0 (0.0)   | 0.0 (0.0)     | 16.0 (0.0) | 215.0 (0.0) | 2                | 9             | 1         | 1000      |
|                |            | 53.6 (0.8)   | 0.0 (0.0)     | 8.2 (0.4)  | 277.6 (2.8) | 2                | 11            | 1         | 1000      |
|                |            | 56.0 (0.0)   | 0.0 (0.0)     | 6.0 (0.0)  | 299.0 (0.0) | 2                | 13            | 1         | 100       |
|                |            | 60.0 (0.0)   | 0.0 (0.0)     | 4.0 (0.0)  | 319.0 (0.0) | 2                | 15            | 1         | 60        |
| <i>napA</i>    | amino acid | 1.4 (0.5)    | 0.0 (0.0)     | 30.8 (0.8) | 14.9 (1.7)  | 2                | 3             | 1         | 1000      |
|                |            | 9.2 (1.4)    | 0.0 (0.0)     | 19.8 (1.4) | 43.7 (4.3)  | 2                | 5             | 1         | 1000      |
|                |            | 15.0 (0.0)   | 0.0 (0.0)     | 14.0 (0.0) | 64.0 (0.0)  | 2                | 7             | 1         | 36        |
|                |            | 22.0 (1.3)   | 0.0 (0.0)     | 7.8 (1.0)  | 100.8 (6.4) | 2                | 9             | 1         | 20        |
|                |            | 28.0 (0.0)   | 0.0 (0.0)     | 3.0 (0.0)  | 135.0 (0.0) | 2                | 11            | 1         | 1         |
|                |            | 28.0 (0.0)   | 0.0 (0.0)     | 3.0 (0.0)  | 135.0 (0.0) | 2                | 13            | 1         | 1         |
|                |            | 31.0 (1.0)   | 0.0 (0.0)     | 0.5 (0.5)  | 165.5 (5.5) | 2                | 15            | 1         | 2         |
| <i>napA</i>    | nucleotide | -            | -             | -          | -           | 2                | 3             | 1         | 0         |
|                |            | -            | -             | -          | -           | 2                | 5             | 1         | 0         |
|                |            | -            | -             | -          | -           | 2                | 7             | 1         | 0         |
|                |            | -            | -             | -          | -           | 2                | 9             | 1         | 0         |
|                |            | -            | -             | -          | -           | 2                | 11            | 1         | 0         |
|                |            | 28.0 (1.0)   | 0.0 (0.0)     | 2.5 (0.5)  | 142.5 (4.5) | 2                | 13            | 1         | 2         |
|                |            | 30.0 (0.0)   | 0.0 (0.0)     | 1.0 (0.0)  | 159.0 (0.0) | 2                | 15            | 1         | 1         |

179 **Table S4.** Predicted horizontal gene transfers of fungal *p450nor*, *napA*, and *nirK* genes based on alien index algorithm.

| Gene           | Query assembly ID*  | Query name                                            | IG† bitscore | OG bitscore | Max bitscore | Alien index value | IG taxon        | OG taxon        | IG name                                        | OG name                                            | IG assembly ID   | OG assembly ID   |
|----------------|---------------------|-------------------------------------------------------|--------------|-------------|--------------|-------------------|-----------------|-----------------|------------------------------------------------|----------------------------------------------------|------------------|------------------|
| <i>p450nor</i> | Apimo1              | <i>Apiospora montagnei</i> NRRL 25634 v1.0            | 418          | 423         | 851          | 0.006             | Sordariomycetes | Dothideomycetes | <i>Valettoniel lopsis laxa</i> CBS 191.97 v1.0 | <i>Peltaster fructicola</i>                        | Valla1           | GCA_0015 92805.1 |
|                | GCA_0000 02855.2    | <i>Aspergillus niger</i> CBS 513 88                   | 353          | 437         | 859          | 0.098             | Eurotiomycetes  | Dothideomycetes | <i>Uncinocarpus reesii</i> 1704                | <i>Macroventuria anomochaeta</i> CBS 525.71 v1.0   | GCA_0000 03515.2 | Macan1           |
|                | GCA_0001 51355.1__3 | <i>Nectria haematococca</i> mpVI 77-13-4              | 469          | 583         | 881          | 0.129             | Sordariomycetes | Eurotiomycetes  | <i>Sporothrix pallida</i>                      | <i>Aspergillus parasiticus</i> SU-1                | GCA_0007 10705.2 | GCA_0009 56085.1 |
|                | GCA_0002 93215.1    | <i>Trichosporon asahii</i> var <i>asahii</i> CBS 2479 | 400          | 572         | 813          | 0.212             | Tremellomycetes | Sordariomycetes | <i>Mrakia blollopis</i>                        | <i>Plectosphaerella cucumerina</i> DS2psM2a 2 v1.0 | GCA_0009 50635.1 | Plecu1           |
|                | GCA_0004 97085.1    | <i>Byssochlamys spectabilis</i>                       | 528          | 659         | 827          | 0.158             | Eurotiomycetes  | Sordariomycetes | <i>Exophiala xenobiotica</i>                   | <i>Trichoderma virens</i> Gv29-8                   | GCA_0008 35505.1 | GCA_0001 70995.2 |
|                | GCA_0007 10705.2    | <i>Sporothrix pallida</i>                             | 577          | 656         | 833          | 0.095             | Sordariomycetes | Dothideomycetes | <i>Colletotrichum gloeosporioides</i> Nara gc5 | <i>Rhytidhysterium rufulum</i>                     | GCA_0003 19635.1 | Rhyru1_1         |
|                | GCA_0007 43665.1    | <i>Geotrichum candidum</i>                            | 586          | 650         | 854          | 0.075             | Leotiomycetes   | Dothideomycetes | <i>Meliniomyces variabilis</i> F v1.0          | <i>Acidomyces richmondensis</i>                    | Melva1           | GCA_0015 72075.1 |
|                | GCA_0008 15965.1    | <i>Mrakia frigida</i>                                 | 279          | 421         | 745          | 0.191             | Tremellomycetes | Eurotiomycetes  | <i>Trichosporon asahii</i> var <i>asahii</i>   | <i>Monascus purpureus</i>                          | GCA_0009 50635.1 | Monpu1           |
|                | GCA_0008 35505.1    | <i>Exophiala xenobiotica</i>                          | 573          | 637         | 887          | 0.072             | Eurotiomycetes  | Dothideomycetes | <i>Microsporium gypseum</i> CBS 118893         | <i>Acidomyces richmondensis</i>                    | GCA_0001 50975.2 | GCA_0015 72075.1 |
|                | GCA_0009 50635.1    | <i>Mrakia blollopis</i>                               | 371          | 531         | 852          | 0.188             | Tremellomycetes | Eurotiomycetes  | <i>Trichosporon asahii</i> var <i>asahii</i>   | <i>Monascus purpureus</i>                          | GCA_0002 93215.1 | Monpu1           |

180 \*Assembly IDs with two underscores followed by a number indicate the query gene is multi copy within the genome.

181 †IG = Ingroup, OG = Outgroup.

182

183 **Table S4.** (continued)

| Gene           | Query assembly ID* | Query name                                     | IG† bitscore | OG bitscore | Max bitscore | Alien index value | IG taxon        | OG taxon        | IG name                                   | OG name                                        | IG assembly ID  | OG assembly ID     |
|----------------|--------------------|------------------------------------------------|--------------|-------------|--------------|-------------------|-----------------|-----------------|-------------------------------------------|------------------------------------------------|-----------------|--------------------|
| <i>p450nor</i> | GCA_001572075.1    | <i>Acidomyces richmondensis</i>                | 584          | 637         | 831          | 0.064             | Dothideomycetes | Eurotiomycetes  | <i>Rhizidhysterium rufulum</i>            | <i>Exophiala xenobiotica</i>                   | Rhyru1_1        | GCA_000835505.1    |
|                | GCA_001592805.1    | <i>Peltaster fruticola</i>                     | 451          | 483         | 840          | 0.038             | Dothideomycetes | Leotiomycetes   | <i>Myriangiururiai</i> CBS 260.36 v1.0    | <i>Sclerotinia sclerotiorum</i> 1980 UF-70     | Myrdu1          | GCA_000146945.1    |
|                | Macan1             | <i>Macroventuria anomochaeta</i> CBS 525.71    | 393          | 437         | 846          | 0.052             | Dothideomycetes | Eurotiomycetes  | <i>Coniosporium apollinis</i> CBS 100218  | <i>Aspergillus niger</i> CBS 513 88            | GCA_000281105.1 | GCA_000002855.2    |
|                | Myrdu1             | <i>Myriangiururiai</i> CBS 260.36              | 451          | 508         | 840          | 0.068             | Dothideomycetes | Sordariomycetes | <i>Peltaster fruticola</i>                | <i>Valetoniella opsis laxa</i> CBS 191.97 v1.0 | GCA_001592805.1 | Valla1             |
|                | Valla1             | <i>Valetoniella opsis laxa</i> CBS 191.97 v1.0 | 418          | 508         | 838          | 0.107             | Sordariomycetes | Dothideomycetes | <i>Apiosporamontagnei</i> NRRL 25634 v1.0 | <i>Myriangiururiai</i> CBS 260.36 v1.0         | Apimo1          | Myrdu1             |
| <i>napA</i>    | GCA_000225285.2    | <i>Epichloe glyceriae</i> E277                 | 270          | 326         | 1367         | 0.041             | Sordariomycetes | Agaricomycetes  | <i>Balansia oblecta</i> B249              | <i>Clavaria fumosa</i>                         | GCA_000709145.1 | GCA_001179745.1__2 |
|                | GCA_000281105.1    | <i>Coniosporium apollinis</i> CBS 100218       | 1416         | 1436        | 2040         | 0.010             | Dothideomycetes | Leotiomycetes   | Fungal sp. No 11243                       | <i>Pseudogymnoascus</i> sp. VKM F-4513 FW-928  | GCA_000836255.1 | GCA_000750755.1    |
|                | GCA_000315175.1    | <i>Herpotrichiella laceae</i> sp. UM238        | 1265         | 1286        | 1989         | 0.011             | Eurotiomycetes  | Sordariomycetes | <i>Aspergillus ustus</i>                  | <i>Colletotrichum higginsianum</i>             | GCA_000812125.1 | GCA_000313795.2    |
|                | GCA_000464645.1    | <i>Melampsora pinitorqua</i> Mpini7            | 437          | 872         | 1645         | 0.264             | Pucciniomycetes | Eurotiomycetes  | <i>Cronartium ribicola</i> 11-2           | <i>Amauroascus niger</i>                       | GCA_000500245.1 | GCA_001430945.1__2 |

184 \*Assembly IDs with two underscores followed by a number indicate the query gene is multi copy within the genome.

185 †IG = Ingroup, OG = Outgroup.

186

187

188 **Table S4.** (continued)

| Gene        | Query assembly ID* | Query name                                    | IG <sup>†</sup> bitscore | OG bitscore | Max bitscore | Alien index value | IG taxon        | OG taxon        | IG name                             | OG name                                       | IG assembly ID   | OG assembly ID   |
|-------------|--------------------|-----------------------------------------------|--------------------------|-------------|--------------|-------------------|-----------------|-----------------|-------------------------------------|-----------------------------------------------|------------------|------------------|
| <i>napA</i> | GCA_0005_00245.1   | <i>Cronartium ribicola</i> 11-2               | 431                      | 905         | 1626         | 0.292             | Pucciniomycetes | Sordariomycetes | <i>Melampsora pinitorqua</i> Mpini7 | <i>Balansia obtecta</i> B249                  | GCA_0004_64645.1 | GCA_0007_09145.1 |
|             | GCA_0006_11775.1   | <i>Umbilicaria muehlenbergii</i>              | n/a                      | 1421        | 2035         | 0.698             | Lecanoromycetes | Leotiomycetes   | <i>Umbilicaria muehlenbergii</i>    | <i>Pseudogymnoascus</i> sp. VKM F-4513 FW-928 | GCA_0006_11775.1 | GCA_0007_50755.1 |
|             | GCA_0007_09145.1   | <i>Balansia obtecta</i> B249                  | 278                      | 925         | 1854         | 0.349             | Sordariomycetes | Pucciniomycetes | <i>Epichloe glyceriae</i> E277      | <i>Cronartium ribicola</i> 11-2               | GCA_0002_25285.2 | GCA_0005_00245.1 |
|             | GCA_0007_50755.1   | <i>Pseudogymnoascus</i> sp. VKM F-4513 FW-928 | 1415                     | 1436        | 2037         | 0.010             | Leotiomycetes   | Dothideomycetes | <i>Geotrichum candidum</i>          | <i>Coniosporium apollinis</i> CBS 100218      | GCA_0007_43665.1 | GCA_0002_81105.1 |
|             | GCA_0014_68955.1   | <i>Cryptococcus albidus</i>                   | n/a                      | 1033        | 2058         | 0.502             | Tremellomycetes | Sordariomycetes | <i>Cryptococcus albidus</i>         | <i>Colletotrichum orbiculare</i> MAFF 240422  | GCA_0014_68955.1 | GCA_0003_50065.1 |
| <i>nirK</i> | GCA_0015_72075.1   | <i>Acidomyces richmondensis</i>               | n/a                      | 559         | 888          | 0.630             | Dothideomycetes | Eurotiomycetes  | <i>Acidomyces richmondensis</i>     | <i>Arthroderma otae</i> CBS 113480            | GCA_0015_72075.1 | GCA_0001_51145.1 |

189 \*Assembly IDs with two underscores followed by a number indicate the query gene is multi copy within the genome.

190 †IG = Ingroup, OG = Outgroup.

191 **Table S5.** List of genera containing species with and without *p450nor*.

| <b>Genus</b>            | <b>Total species</b> | <b>Species with <i>p450nor</i></b> | <b>Percentage with <i>p450nor</i></b> |
|-------------------------|----------------------|------------------------------------|---------------------------------------|
| <i>Arthroderma</i>      | 2                    | 1                                  | 50.0                                  |
| <i>Aspergillus</i>      | 20                   | 9                                  | 45.0                                  |
| <i>Bipolaris</i>        | 6                    | 2                                  | 33.3                                  |
| <i>Colletotrichum</i>   | 10                   | 5                                  | 50.0                                  |
| <i>Diaporthe</i>        | 3                    | 1                                  | 33.3                                  |
| <i>Diplodia</i>         | 3                    | 2                                  | 66.7                                  |
| <i>Exophiala</i>        | 7                    | 1                                  | 14.3                                  |
| <i>Fusarium</i>         | 16                   | 13                                 | 81.3                                  |
| <i>Hirsutella</i>       | 2                    | 1                                  | 50.0                                  |
| <i>Hymenoscyphus</i>    | 7                    | 5                                  | 71.4                                  |
| <i>Metarhizium</i>      | 7                    | 6                                  | 85.7                                  |
| <i>Neosartorya</i>      | 2                    | 1                                  | 50.0                                  |
| <i>Neurospora</i>       | 6                    | 4                                  | 66.7                                  |
| <i>Pseudogymnoascus</i> | 16                   | 15                                 | 93.8                                  |
| <i>Pyrenochaeta</i>     | 3                    | 1                                  | 33.3                                  |
| <i>Rhytidhysterion</i>  | 2                    | 1                                  | 50.0                                  |
| <i>Rutstroemia</i>      | 2                    | 1                                  | 50.0                                  |
| <i>Sclerotinia</i>      | 3                    | 2                                  | 66.7                                  |
| <i>Sporothrix</i>       | 3                    | 1                                  | 33.3                                  |
| <i>Trichoderma</i>      | 8                    | 4                                  | 50.0                                  |
| <i>Trichophyton</i>     | 6                    | 5                                  | 83.3                                  |
| <i>Trichosporon</i>     | 2                    | 1                                  | 50.0                                  |

192

193

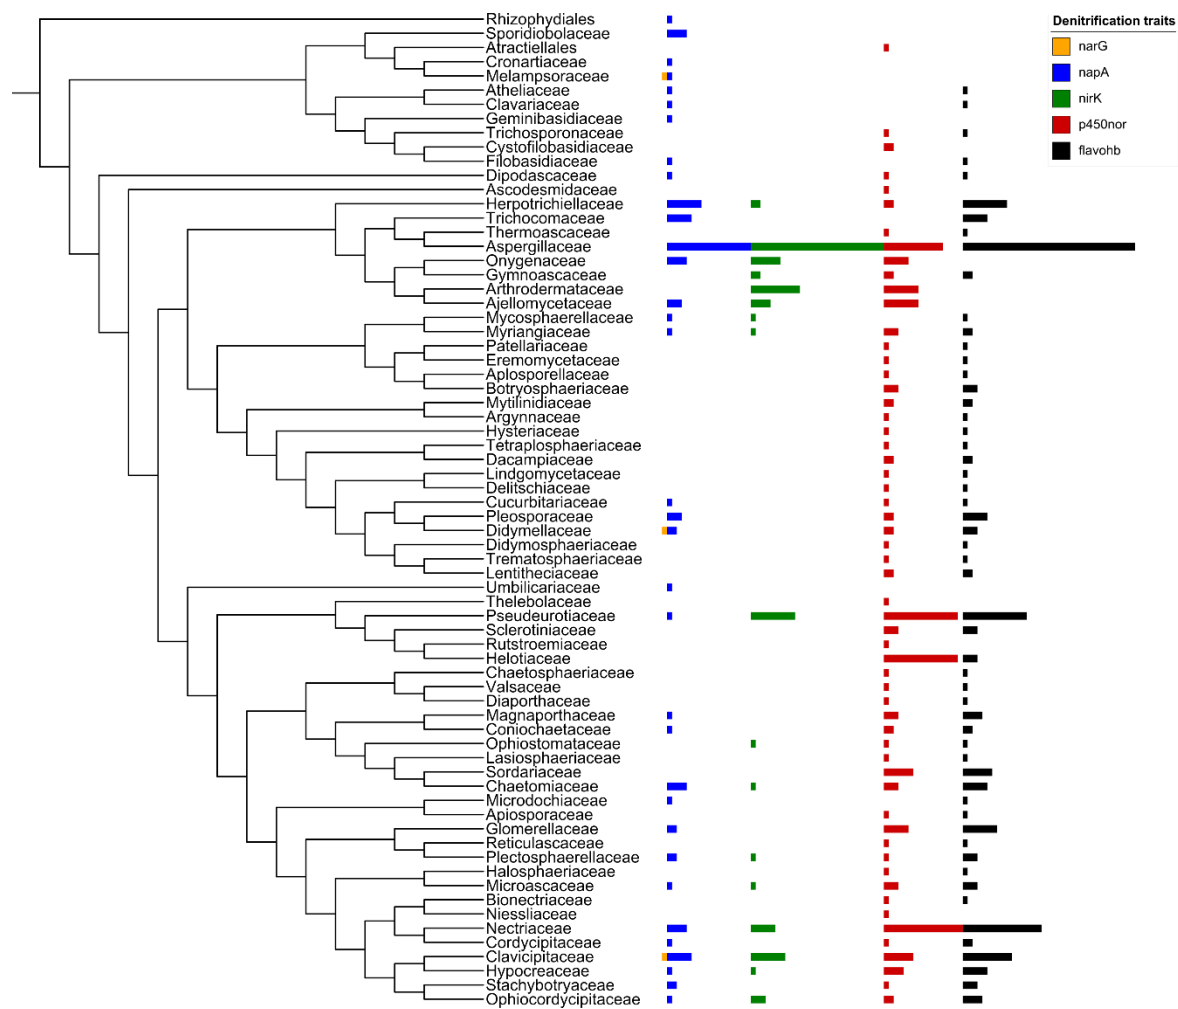

194

195

196 **Figure S1.** Gene abundances of *narG*, *napA*, *nirK*, *p450nor*, and flavohemoglobins (colored  
 197 bars) mapped on to fungal families (cladogram, left). Relationships among fungal families in the  
 198 cladogram were derived from the NCBI taxonomy using the online tool phyloT  
 199 (<http://phylo.t.biobyte.de/index.html>).



200

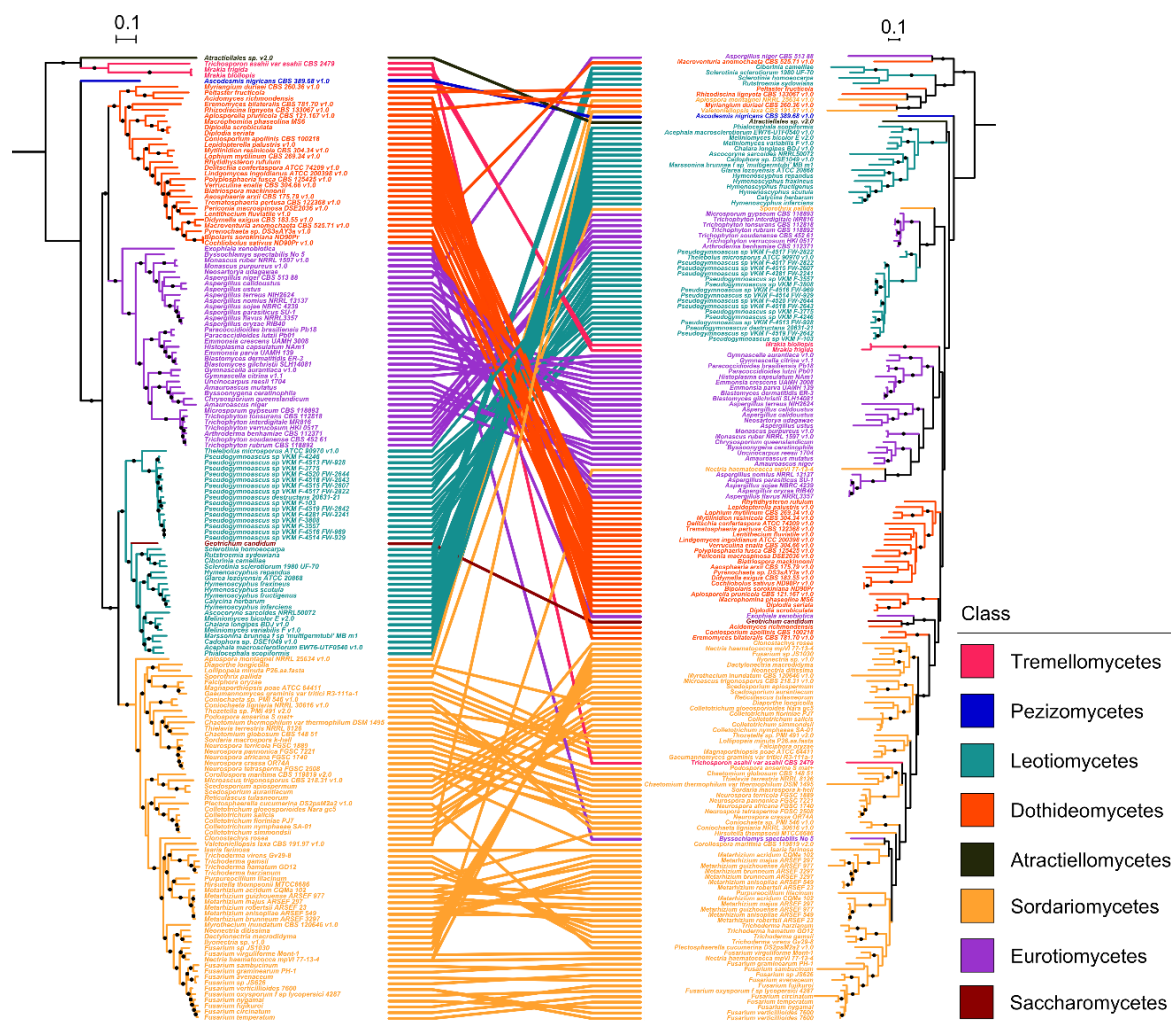

201

202

203 **Figure S2.** Maximum-Likelihood phylogenies connecting fungal species with their respective  
 204 NO reductase (*p450nor*) gene sequence(s). On the left, an amino acid phylogeny of 238  
 205 concatenated single copy orthologues from fungal species in which one or more *p450nor* gene(s)  
 206 were detected. The *p450nor* nucleotide phylogeny (right) demonstrates many instances of  
 207 incongruence with the fungal species phylogeny. Black dots in each phylogeny represent  
 208 bootstrap percentages greater than or equal to 90%. Scale bars represent amino acid (left tree)  
 209 and nucleotide (right tree) substitutions per site. A high-resolution file of the tree is available at  
 210 <https://doi.org/10.6084/m9.figshare.c.3845692>.

211

212

213

214

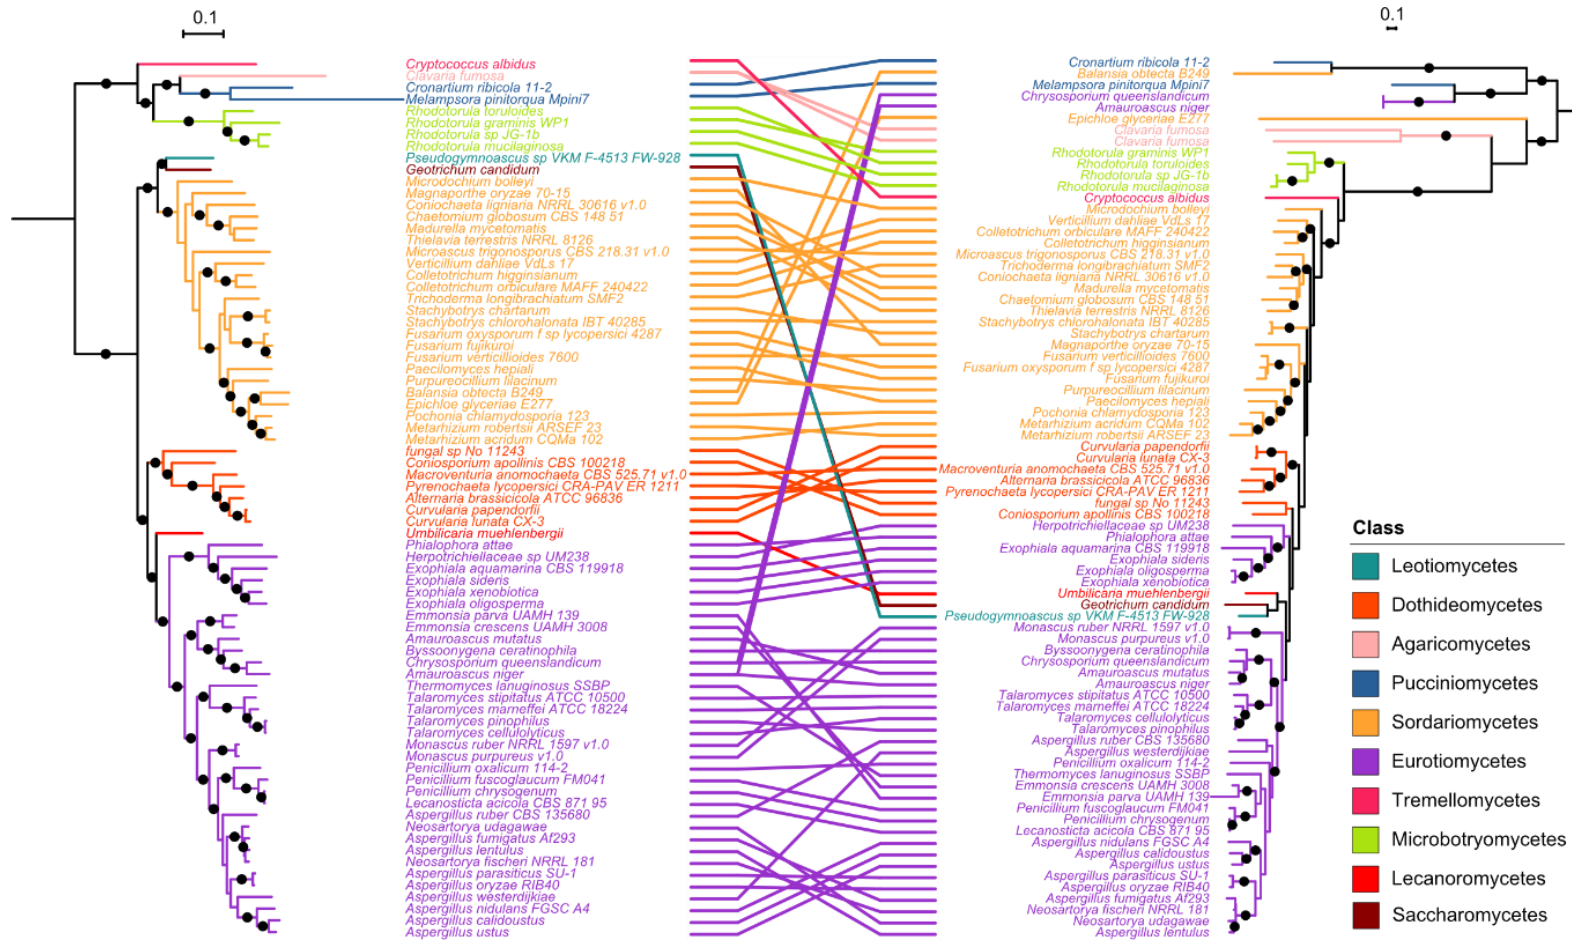

215

216

217 **Figure S3.** Cophylogenetic plot of *napA*-containing fungal species (left, N = 75) and the *napA* nucleotide tree (right, N = 78). Both are  
 218 midpoint rooted Maximum-Likelihood trees where black dots represent bootstrap percentages  $\geq 90$  %. Scale bars indicate substitutions  
 219 per site for the concatenated amino acid species phylogeny and nucleotide phylogeny, respectively. A high-resolution file of the tree is  
 220 available at <https://doi.org/10.6084/m9.figshare.c.3845692>.



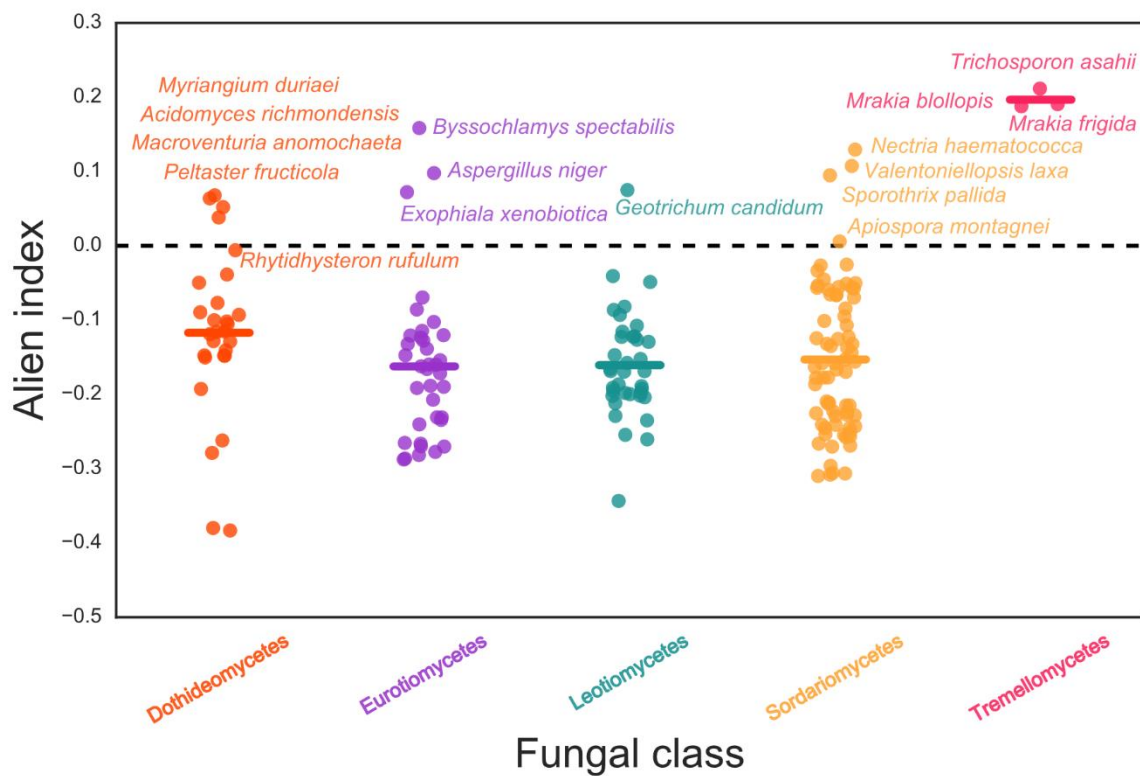

227

228 **Figure S5.** Plot of alien index values observed for *p450nor* genes (N = 178). Points above the  
 229 hashed line at the origin are indicative of HGT. Names of fungal species with alien index values  
 230 above zero are ordered as their points appear on the graph. Thick horizontal lines represent the  
 231 median alien index value. See Materials and Methods in Supplementary Materials for details on  
 232 alien index calculations.

233

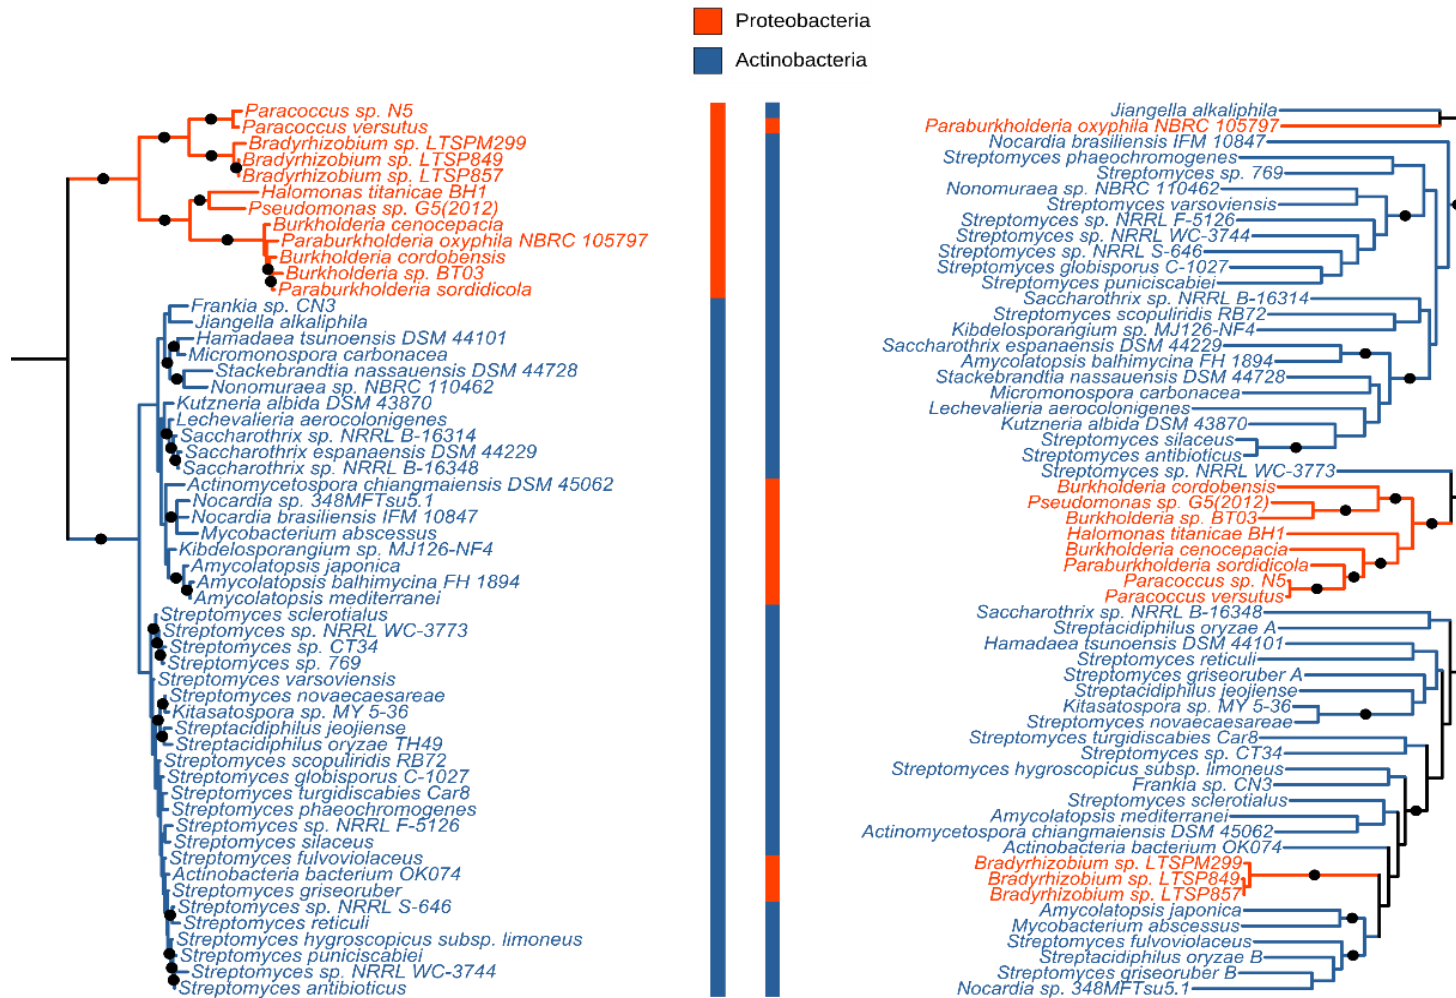

234

235 **Figure S6.** Bayesian tree reconstruction of actinobacterial and proteobacterial 16S rRNA genes (left, N = 55) and cytochrome P450  
 236 family 105 amino acid sequences (right, N = 57). Both phylogenies represent 50% majority-rule consensus trees. The tree on the left is  
 237 rooted with proteobacterial sequences as outgroup to the *Actinobacteria*. The tree on the right is midpoint rooted. Nodes with posterior  
 238 probabilities  $\geq 0.95$  are indicated by black circles on an adjacent branch.

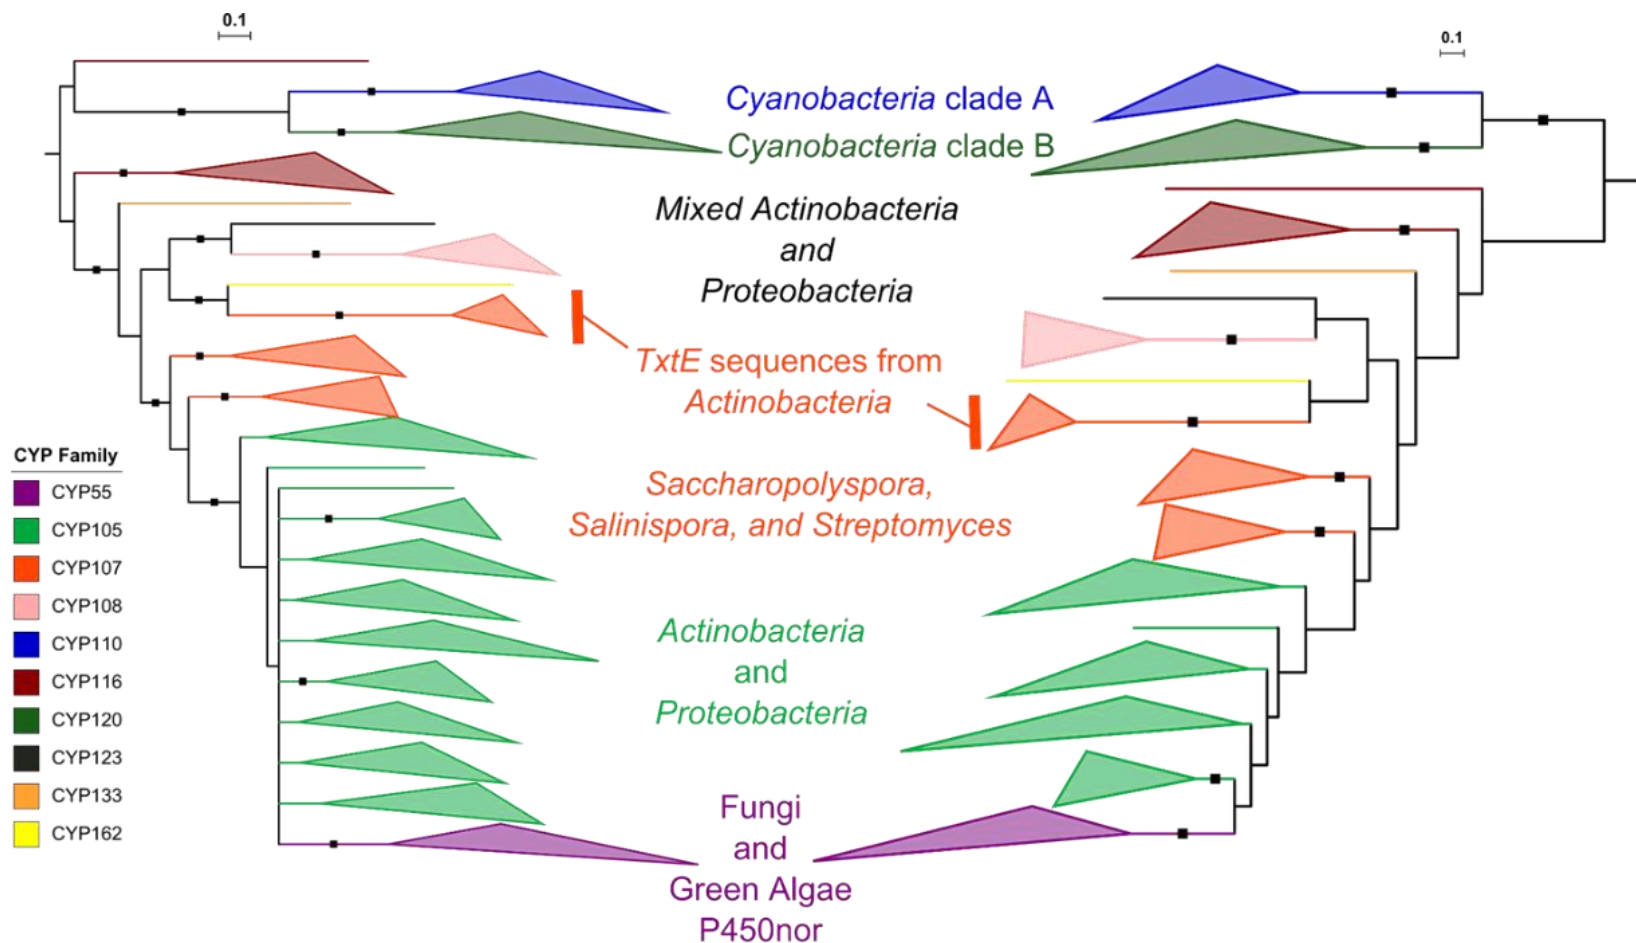

239

240

241 **Figure S7.** Midpoint rooted Bayesian (left) and Maximum-Likelihood phylogenies (right) of cytochrome P450 sequences (N = 408)  
 242 demonstrating the affiliation of P450nor with other sequences belonging to members of the bacterial phyla *Actinobacteria* and  
 243 *Proteobacteria*. Cyanobacterial cytochrome P450 sequences were included as outgroups. Black squares on branches (left tree) indicate  
 244  $\geq 0.95$  posterior probability or  $\geq 90\%$  bootstrap replication (right tree). The colored legend indicates the cytochrome P450 family  
 245 specified by shared amino acid identity of  $\geq 40\%$  (39).

246

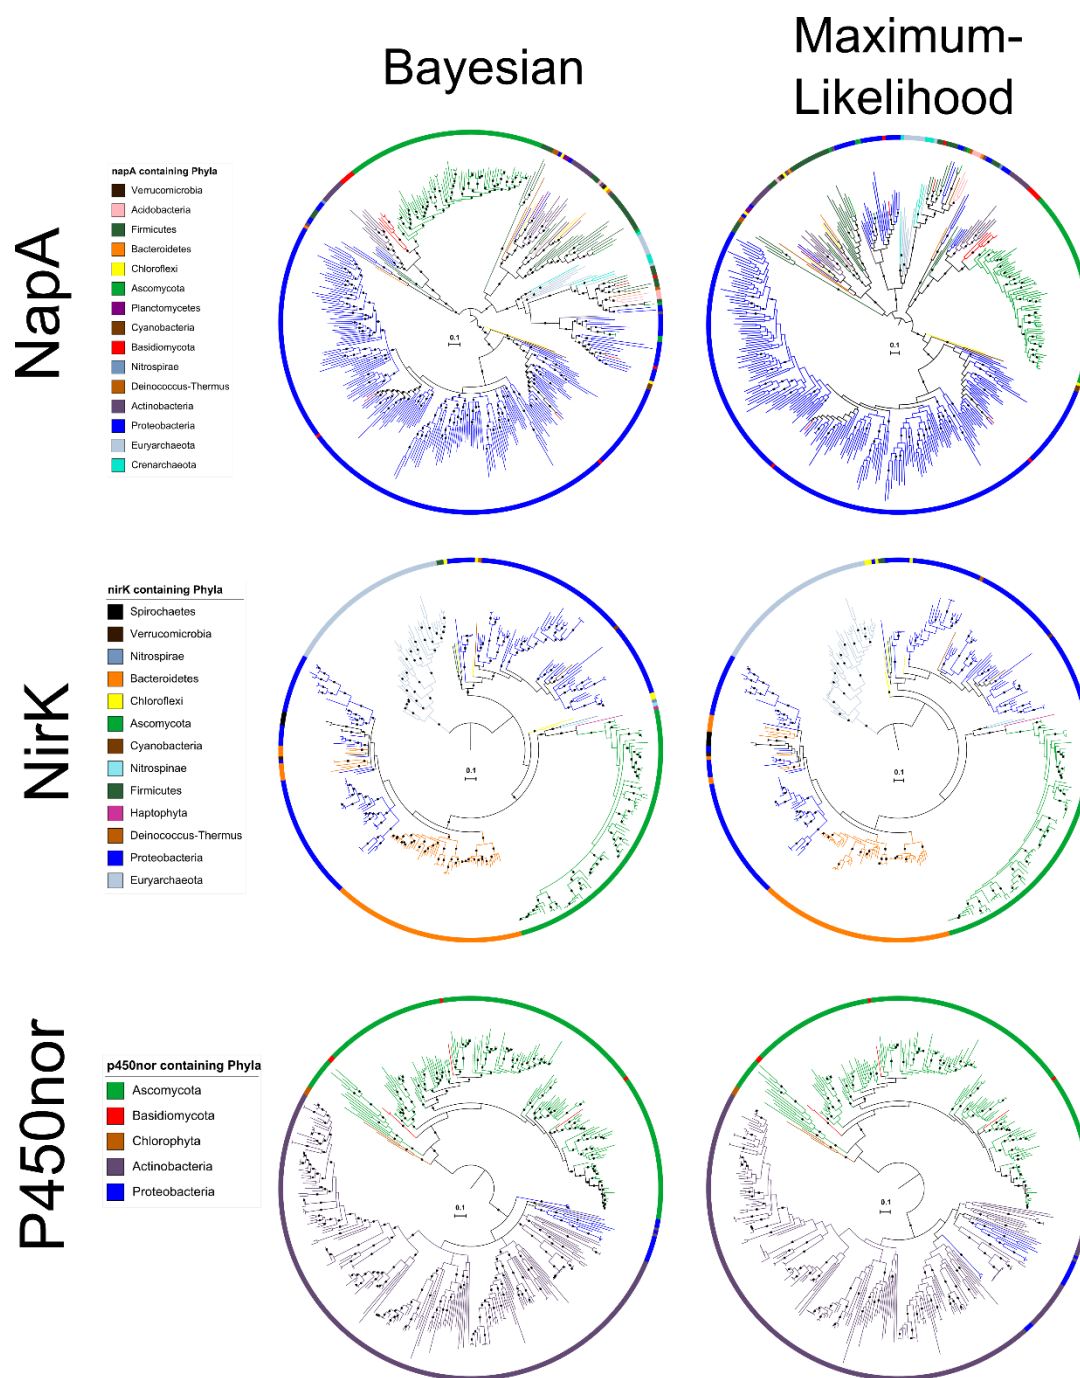

247

248 **Figure S8.** Bayesian and Maximum-likelihood phylogenies of NapA, NirK, and P450nor amino  
 249 acid sequence homologs extracted from the RefSeq protein database. A high-resolution file of  
 250 these trees are available at <https://doi.org/10.6084/m9.figshare.c.3845692>.

251

252
